# Supplementary material
Source: MDPI journal article supplement (https://www.mdpi.com/search?q=nutrients-13-00470)
Supplement: s001 [file nutrients-13-00470-s001.pdf]

# The effect of a combined gluten- and casein-free diet on children and adolescents with autism spectrum disorders: A systematic review and meta-analysis

Amélie Keller, Marie Louise Rimestad, Jeanett Friis Rohde, Birgitte Holm Petersen, Christoffer Bruun Korfitsen, Simon Tarp, Marlene Briciet Lauritsen, Mina Nicole Händel

---

## Supplementary material

### Contents

|                                                                                             |    |
|---------------------------------------------------------------------------------------------|----|
| PRISMA checklist .....                                                                      | 2  |
| Search description .....                                                                    | 5  |
| Search for systematic reviews/meta-analyses .....                                           | 5  |
| Medline (030120) .....                                                                      | 5  |
| Embase (030120) .....                                                                       | 7  |
| Cinahl (030120) .....                                                                       | 9  |
| Primary search .....                                                                        | 10 |
| Medline (270120) .....                                                                      | 10 |
| Embase (270120) .....                                                                       | 12 |
| Cinahl (270120) .....                                                                       | 14 |
| Assessment of the methodological quality of the included systematic reviews (AMSTAR). ..... | 15 |
| Characteristics of excluded studies .....                                                   | 16 |

The effect of a combined gluten- and casein-free diet on children and adolescents with autism spectrum disorders: A systematic review and meta-analysis

Amélie Keller, Marie Louise Rimestad, Jeanett Friis Rohde, Birgitte Holm Petersen, Christoffer Bruun Korfitsen, Simon Tarp, Marlene Briciet Lauritsen, Mina Nicole Händel

## PRISMA checklist

| Section/topic             | #  | Checklist item                                                                                                                                                                                                                                                                                              | Reported on page # |
|---------------------------|----|-------------------------------------------------------------------------------------------------------------------------------------------------------------------------------------------------------------------------------------------------------------------------------------------------------------|--------------------|
| <b>TITLE</b>              |    |                                                                                                                                                                                                                                                                                                             |                    |
| Title                     | 1  | Identify the report as a systematic review, meta-analysis, or both.                                                                                                                                                                                                                                         | 1                  |
| <b>ABSTRACT</b>           |    |                                                                                                                                                                                                                                                                                                             |                    |
| Structured summary        | 2  | Provide a structured summary including, as applicable: background; objectives; data sources; study eligibility criteria, participants, and interventions; study appraisal and synthesis methods; results; limitations; conclusions and implications of key findings; systematic review registration number. | 2                  |
| <b>INTRODUCTION</b>       |    |                                                                                                                                                                                                                                                                                                             |                    |
| Rationale                 | 3  | Describe the rationale for the review in the context of what is already known.                                                                                                                                                                                                                              | 3-4                |
| Objectives                | 4  | Provide an explicit statement of questions being addressed with reference to participants, interventions, comparisons, outcomes, and study design (PICOS).                                                                                                                                                  | 4                  |
| <b>METHODS</b>            |    |                                                                                                                                                                                                                                                                                                             |                    |
| Protocol and registration | 5  | Indicate if a review protocol exists, if and where it can be accessed (e.g., Web address), and, if available, provide registration information including registration number.                                                                                                                               | 5                  |
| Eligibility criteria      | 6  | Specify study characteristics (e.g., PICOS, length of follow-up) and report characteristics (e.g., years considered, language, publication status) used as criteria for eligibility, giving rationale.                                                                                                      | 5-6                |
| Information sources       | 7  | Describe all information sources (e.g., databases with dates of coverage, contact with study authors to identify additional studies) in the search and date last searched.                                                                                                                                  | 5                  |
| Search                    | 8  | Present full electronic search strategy for at least one database, including any limits used, such that it could be repeated.                                                                                                                                                                               | 5                  |
| Study selection           | 9  | State the process for selecting studies (i.e., screening, eligibility, included in systematic review, and, if applicable, included in the meta-analysis).                                                                                                                                                   | 5-6                |
| Data collection process   | 10 | Describe method of data extraction from reports (e.g., piloted forms, independently, in duplicate) and any processes for obtaining and confirming data from investigators.                                                                                                                                  | 7                  |
| Data items                | 11 | List and define all variables for which data were sought (e.g., PICOS, funding sources) and any assumptions and simplifications made.                                                                                                                                                                       | 7                  |

# The effect of a combined gluten- and casein-free diet on children and adolescents with autism spectrum disorders: A systematic review and meta-analysis

Amélie Keller, Marie Louise Rimestad, Jeanett Friis Rohde, Birgitte Holm Petersen, Christoffer Bruun Korfitsen, Simon Tarp, Marlene Briciet Lauritsen, Mina Nicole Händel

|                                    |    |                                                                                                                                                                                                                        |   |
|------------------------------------|----|------------------------------------------------------------------------------------------------------------------------------------------------------------------------------------------------------------------------|---|
| Risk of bias in individual studies | 12 | Describe methods used for assessing risk of bias of individual studies (including specification of whether this was done at the study or outcome level), and how this information is to be used in any data synthesis. | 8 |
| Summary measures                   | 13 | State the principal summary measures (e.g., risk ratio, difference in means).                                                                                                                                          | 9 |
| Synthesis of results               | 14 | Describe the methods of handling data and combining results of studies, if done, including measures of consistency (e.g., $I^2$ ) for each meta-analysis.                                                              | 9 |

Page 1 of 2

| Section/topic                 | #  | Checklist item                                                                                                                                                                                           | Reported on page #                    |
|-------------------------------|----|----------------------------------------------------------------------------------------------------------------------------------------------------------------------------------------------------------|---------------------------------------|
| Risk of bias across studies   | 15 | Specify any assessment of risk of bias that may affect the cumulative evidence (e.g., publication bias, selective reporting within studies).                                                             | 8                                     |
| Additional analyses           | 16 | Describe methods of additional analyses (e.g., sensitivity or subgroup analyses, meta-regression), if done, indicating which were pre-specified.                                                         | NA                                    |
| <b>RESULTS</b>                |    |                                                                                                                                                                                                          |                                       |
| Study selection               | 17 | Give numbers of studies screened, assessed for eligibility, and included in the review, with reasons for exclusions at each stage, ideally with a flow diagram.                                          | 10-12                                 |
| Study characteristics         | 18 | For each study, present characteristics for which data were extracted (e.g., study size, PICOS, follow-up period) and provide the citations.                                                             | 12, table 1                           |
| Risk of bias within studies   | 19 | Present data on risk of bias of each study and, if available, any outcome level assessment (see item 12).                                                                                                | 19, Fig 4-9                           |
| Results of individual studies | 20 | For all outcomes considered (benefits or harms), present, for each study: (a) simple summary data for each intervention group (b) effect estimates and confidence intervals, ideally with a forest plot. | 16-19, Fig 4-9                        |
| Synthesis of results          | 21 | Present results of each meta-analysis done, including confidence intervals and measures of consistency.                                                                                                  | 16-19                                 |
| Risk of bias across studies   | 22 | Present results of any assessment of risk of bias across studies (see Item 15).                                                                                                                          | 19-20, Fig 4-9, supplemental material |
| Additional analysis           | 23 | Give results of additional analyses, if done (e.g., sensitivity or subgroup analyses, meta-regression [see Item 16]).                                                                                    | NA                                    |
| <b>DISCUSSION</b>             |    |                                                                                                                                                                                                          |                                       |

# The effect of a combined gluten- and casein-free diet on children and adolescents with autism spectrum disorders: A systematic review and meta-analysis

Amélie Keller, Marie Louise Rimestad, Jeanett Friis Rohde, Birgitte Holm Petersen, Christoffer Bruun Korfitsen, Simon Tarp, Marlene Briciet Lauritsen, Mina Nicole Händel

|                     |    |                                                                                                                                                                                      |       |
|---------------------|----|--------------------------------------------------------------------------------------------------------------------------------------------------------------------------------------|-------|
| Summary of evidence | 24 | Summarize the main findings including the strength of evidence for each main outcome; consider their relevance to key groups (e.g., healthcare providers, users, and policy makers). | 23    |
| Limitations         | 25 | Discuss limitations at study and outcome level (e.g., risk of bias), and at review-level (e.g., incomplete retrieval of identified research, reporting bias).                        | 24-26 |
| Conclusions         | 26 | Provide a general interpretation of the results in the context of other evidence, and implications for future research.                                                              | 26    |
| <b>FUNDING</b>      |    |                                                                                                                                                                                      |       |
| Funding             | 27 | Describe sources of funding for the systematic review and other support (e.g., supply of data); role of funders for the systematic review.                                           | 27    |

From: Moher D, Liberati A, Tetzlaff J, Altman DG, The PRISMA Group (2009). Preferred Reporting Items for Systematic Reviews and Meta-Analyses: The PRISMA Statement. PLoS Med 6(7): e1000097. doi:10.1371/journal.pmed1000097

For more information, visit: [www.prisma-statement.org](http://www.prisma-statement.org).

# The effect of a combined gluten- and casein-free diet on children and adolescents with autism spectrum disorders: A systematic review and meta-analysis

Amélie Keller, Marie Louise Rimestad, Jeanett Friis Rohde, Birgitte Holm Petersen, Christoffer Bruun Korfitsen, Simon Tarp, Marlene Briciet Lauritsen, Mina Nicole Händel

## Search description

### Search for systematic reviews/meta-analyses

#### Medline (030120)

Database(s): **Ovid MEDLINE(R) and Epub Ahead of Print, In-Process & Other Non-Indexed Citations, Daily and Versions(R)** 1946 to January 02, 2020

Search Strategy:

| #  | Searches                                                                                                                                                                                                                                                                                                 | Results |
|----|----------------------------------------------------------------------------------------------------------------------------------------------------------------------------------------------------------------------------------------------------------------------------------------------------------|---------|
| 1  | (autism* or ASD).mp. [mp=title, abstract, original title, name of substance word, subject heading word, floating sub-heading word, keyword heading word, organism supplementary concept word, protocol supplementary concept word, rare disease supplementary concept word, unique identifier, synonyms] | 49062   |
| 2  | Autism Spectrum Disorder*.mp. or Autism Spectrum Disorder/                                                                                                                                                                                                                                               | 23277   |
| 3  | Autism Disorder*.mp.                                                                                                                                                                                                                                                                                     | 119     |
| 4  | Autistic Disorder/ or Autistic Disorder*.mp.                                                                                                                                                                                                                                                             | 20451   |
| 5  | autistic*.mp.                                                                                                                                                                                                                                                                                            | 24796   |
| 6  | Asperger Syndrome/ or asperger*.mp.                                                                                                                                                                                                                                                                      | 2724    |
| 7  | asperger*.mp.                                                                                                                                                                                                                                                                                            | 2724    |
| 8  | Neurodevelopmental Disorders/ or neurodevelopmental disorder*.mp.                                                                                                                                                                                                                                        | 10279   |
| 9  | Child Development Disorders, Pervasive.mp. or Child Development Disorders, Pervasive/                                                                                                                                                                                                                    | 6531    |
| 10 | or/1-9                                                                                                                                                                                                                                                                                                   | 63127   |
| 11 | ((systematic or method* or rapid or integrative or umbrella) adj3 (review* or overview* or study or studies or search* or approach*)) or meta analy* or meta-analy* or metaanaly*).ti,ab,kw,kf,bt.                                                                                                       | 785685  |
| 12 | (pooled adj1 (data or analys*)).ti,ab.                                                                                                                                                                                                                                                                   | 17385   |
| 13 | (pubmed or medline or embase or cochrane or "web of science" or psycinfo or psychinfo or scopus).ti,ab.                                                                                                                                                                                                  | 220226  |
| 14 | Cochrane.jw.                                                                                                                                                                                                                                                                                             | 14875   |
| 15 | Diet, Gluten-Free/ or gluten*.mp. or Glutens/                                                                                                                                                                                                                                                            | 14188   |

# The effect of a combined gluten- and casein-free diet on children and adolescents with autism spectrum disorders: A systematic review and meta-analysis

Amélie Keller, Marie Louise Rimestad, Jeanett Friis Rohde, Birgitte Holm Petersen, Christoffer Bruun Korfitsen, Simon Tarp, Marlene Briciet Lauritsen, Mina Nicole Händel

|    |                                                                                                                                                                                                                                                                                                                    |        |
|----|--------------------------------------------------------------------------------------------------------------------------------------------------------------------------------------------------------------------------------------------------------------------------------------------------------------------|--------|
| 16 | casein*.mp.                                                                                                                                                                                                                                                                                                        | 34829  |
| 17 | Celiac Disease/ or Celiac Disease*.mp.                                                                                                                                                                                                                                                                             | 22682  |
| 18 | Caseins/ or Food Hypersensitivity/ or casein intolerance*.mp. or Milk Proteins/                                                                                                                                                                                                                                    | 40649  |
| 19 | gluten intolerance*.mp.                                                                                                                                                                                                                                                                                            | 352    |
| 20 | casein-free*.mp.                                                                                                                                                                                                                                                                                                   | 105    |
| 21 | casein intolerance*.mp.                                                                                                                                                                                                                                                                                            | 1      |
| 22 | Food Hypersensitivit*.mp.                                                                                                                                                                                                                                                                                          | 15847  |
| 23 | (diet* and elimination*).mp. [mp=title, abstract, original title, name of substance word, subject heading word, floating sub-heading word, keyword heading word, organism supplementary concept word, protocol supplementary concept word, rare disease supplementary concept word, unique identifier, synonyms]   | 5999   |
| 24 | elimination diet*.mp.                                                                                                                                                                                                                                                                                              | 1104   |
| 25 | (elimination* and casein*).mp. [mp=title, abstract, original title, name of substance word, subject heading word, floating sub-heading word, keyword heading word, organism supplementary concept word, protocol supplementary concept word, rare disease supplementary concept word, unique identifier, synonyms] | 211    |
| 26 | (elimination* and gluten*).mp. [mp=title, abstract, original title, name of substance word, subject heading word, floating sub-heading word, keyword heading word, organism supplementary concept word, protocol supplementary concept word, rare disease supplementary concept word, unique identifier, synonyms] | 204    |
| 27 | GI.mp. or Gastrointestinal Diseases/                                                                                                                                                                                                                                                                               | 78781  |
| 28 | gastrointestinal*.mp.                                                                                                                                                                                                                                                                                              | 360425 |
| 29 | 15 or 16 or 17 or 18 or 19 or 20 or 21 or 22 or 23 or 24 or 25 or 26 or 27 or 28                                                                                                                                                                                                                                   | 468270 |
| 30 | 11 or 12 or 13 or 14                                                                                                                                                                                                                                                                                               | 868513 |
| 31 | 10 and 29 and 30                                                                                                                                                                                                                                                                                                   | 99     |

# The effect of a combined gluten- and casein-free diet on children and adolescents with autism spectrum disorders: A systematic review and meta-analysis

Amélie Keller, Marie Louise Rimestad, Jeanett Friis Rohde, Birgitte Holm Petersen, Christoffer Bruun Korfitsen, Simon Tarp, Marlene Briciet Lauritsen, Mina Nicole Händel

## Embase (030120)

Database(s): **Embase** 1996 to 2019 Week 52

Search Strategy:

| #  | Searches                                                                                                                                                                                                    | Results |
|----|-------------------------------------------------------------------------------------------------------------------------------------------------------------------------------------------------------------|---------|
| 1  | (autism* or ASD).mp. [mp=title, abstract, heading word, drug trade name, original title, device manufacturer, drug manufacturer, device trade name, keyword, floating subheading word, candidate term word] | 75915   |
| 2  | Autism Spectrum Disorder*.mp. or Autism Spectrum Disorder/                                                                                                                                                  | 50988   |
| 3  | Autism Disorder*.mp.                                                                                                                                                                                        | 186     |
| 4  | Autistic Disorder/ or Autistic Disorder*.mp.                                                                                                                                                                | 20572   |
| 5  | autistic*.mp.                                                                                                                                                                                               | 13831   |
| 6  | Asperger Syndrome/ or asperger*.mp.                                                                                                                                                                         | 5238    |
| 7  | asperger*.mp.                                                                                                                                                                                               | 5238    |
| 8  | Neurodevelopmental Disorders/ or neurodevelopmental disorder*.mp.                                                                                                                                           | 141599  |
| 9  | Child Development Disorders, Pervasive.mp. or Child Development Disorders, Pervasive/                                                                                                                       | 19084   |
| 10 | or/1-9                                                                                                                                                                                                      | 211156  |
| 11 | ((systematic or method* or rapid or integrative or umbrella) adj3 (review* or overview* or study or studies or search* or approach*)) or meta analy* or meta-analy* or metaanaly*).ti,ab,kw.                | 1018589 |
| 12 | (pooled adj1 (data or analys*).ti,ab.                                                                                                                                                                       | 26200   |
| 13 | (pubmed or medline or embase or cochrane or "web of science" or psycinfo or psychinfo or scopus).ti,ab.                                                                                                     | 268639  |
| 14 | Cochrane.jw.                                                                                                                                                                                                | 21196   |
| 15 | Diet, Gluten-Free/ or gluten*.mp. or Glutens/                                                                                                                                                               | 17028   |
| 16 | casein*.mp.                                                                                                                                                                                                 | 26458   |
| 17 | Celiac Disease/ or Celiac Disease*.mp.                                                                                                                                                                      | 26118   |
| 18 | Caseins/ or Food Hypersensitivity/ or casein intolerance*.mp. or Milk Proteins/                                                                                                                             | 23477   |

# The effect of a combined gluten- and casein-free diet on children and adolescents with autism spectrum disorders: A systematic review and meta-analysis

Amélie Keller, Marie Louise Rimestad, Jeanett Friis Rohde, Birgitte Holm Petersen, Christoffer Bruun Korfitsen, Simon Tarp, Marlene Briciet Lauritsen, Mina Nicole Händel

|    |                                                                                                                                                                                                                       |         |
|----|-----------------------------------------------------------------------------------------------------------------------------------------------------------------------------------------------------------------------|---------|
| 19 | gluten intolerance*.mp.                                                                                                                                                                                               | 395     |
| 20 | casein-free*.mp.                                                                                                                                                                                                      | 147     |
| 21 | casein intolerance*.mp.                                                                                                                                                                                               | 3       |
| 22 | Food Hypersensitivit*.mp.                                                                                                                                                                                             | 1454    |
| 23 | (diet* and elimination*).mp. [mp=title, abstract, heading word, drug trade name, original title, device manufacturer, drug manufacturer, device trade name, keyword, floating subheading word, candidate term word]   | 7884    |
| 24 | elimination diet*.mp.                                                                                                                                                                                                 | 1962    |
| 25 | (elimination* and casein*).mp. [mp=title, abstract, heading word, drug trade name, original title, device manufacturer, drug manufacturer, device trade name, keyword, floating subheading word, candidate term word] | 262     |
| 26 | (elimination* and gluten*).mp. [mp=title, abstract, heading word, drug trade name, original title, device manufacturer, drug manufacturer, device trade name, keyword, floating subheading word, candidate term word] | 314     |
| 27 | GI.mp. or Gastrointestinal Diseases/                                                                                                                                                                                  | 76399   |
| 28 | gastrointestinal*.mp.                                                                                                                                                                                                 | 461540  |
| 29 | 15 or 16 or 17 or 18 or 19 or 20 or 21 or 22 or 23 or 24 or 25 or 26 or 27 or 28                                                                                                                                      | 561687  |
| 30 | 11 or 12 or 13 or 14                                                                                                                                                                                                  | 1126220 |
| 31 | 10 and 29 and 30                                                                                                                                                                                                      | 594     |



# The effect of a combined gluten- and casein-free diet on children and adolescents with autism spectrum disorders: A systematic review and meta-analysis

Amélie Keller, Marie Louise Rimestad, Jeanett Friis Rohde, Birgitte Holm Petersen, Christoffer Bruun Korfitsen, Simon Tarp, Marlene Briciet Lauritsen, Mina Nicole Händel

---

## *Cinahl (030120)*

| #   | Query                                                            | Results |
|-----|------------------------------------------------------------------|---------|
| S19 | S16 AND S17 AND S18                                              | 33      |
| S18 | S5 OR S6 OR S7 OR S8 OR S9 OR S10 OR S11 OR S12 OR S13           | 224,438 |
| S17 | S1 OR S2                                                         | 28,070  |
| S16 | S14 OR S15                                                       | 148,809 |
| S15 | (MH "Meta Analysis") OR "meta analys**"                          | 72,478  |
| S14 | (MH "Systematic Review") OR "systematic review**"                | 119,577 |
| S13 | (MH "Food Hypersensitivity+") OR "food hypersensitivities"       | 5,627   |
| S12 | food hypersensitivit*                                            | 5,151   |
| S11 | elimination diet*                                                | 236     |
| S10 | gluten* and elimination*                                         | 55      |
| S9  | casein* and elimination*                                         | 19      |
| S8  | diet* and elimination*                                           | 767     |
| S7  | (MH "Diet+") OR (MH "Restricted Diet+") OR "diet**"              | 219,839 |
| S6  | casein*                                                          | 1,383   |
| S5  | (MH "Caseins")                                                   | 685     |
| S4  | gluten*                                                          | 4,020   |
| S3  | (MH "Celiac Disease+") OR (MH "Gluten") OR "gluten"              | 6,214   |
| S2  | (MH "Autistic Disorder") OR (MH "Asperger Syndrome") OR "autism" | 26,521  |
| S1  | autism* or ASD                                                   | 24,702  |

# The effect of a combined gluten- and casein-free diet on children and adolescents with autism spectrum disorders: A systematic review and meta-analysis

Amélie Keller, Marie Louise Rimestad, Jeanett Friis Rohde, Birgitte Holm Petersen, Christoffer Bruun Korfitsen, Simon Tarp, Marlene Briciet Lauritsen, Mina Nicole Händel

## Primary search

### Medline (270120)

Database(s): **Ovid MEDLINE(R) and Epub Ahead of Print, In-Process & Other Non-Indexed Citations, Daily and Versions(R)** 1946 to January 24, 2020

Search Strategy:

| #  | Searches                                                                                                                                                                                                                                                                                                 | Results |
|----|----------------------------------------------------------------------------------------------------------------------------------------------------------------------------------------------------------------------------------------------------------------------------------------------------------|---------|
| 1  | (autism* or ASD).mp. [mp=title, abstract, original title, name of substance word, subject heading word, floating sub-heading word, keyword heading word, organism supplementary concept word, protocol supplementary concept word, rare disease supplementary concept word, unique identifier, synonyms] | 49444   |
| 2  | Autism Spectrum Disorder*.mp. or Autism Spectrum Disorder/                                                                                                                                                                                                                                               | 23524   |
| 3  | Autism Disorder*.mp.                                                                                                                                                                                                                                                                                     | 119     |
| 4  | Autistic Disorder/ or Autistic Disorder*.mp.                                                                                                                                                                                                                                                             | 20488   |
| 5  | autistic*.mp.                                                                                                                                                                                                                                                                                            | 24872   |
| 6  | Asperger Syndrome/ or asperger*.mp.                                                                                                                                                                                                                                                                      | 2730    |
| 7  | asperger*.mp.                                                                                                                                                                                                                                                                                            | 2730    |
| 8  | Neurodevelopmental Disorders/ or neurodevelopmental disorder*.mp.                                                                                                                                                                                                                                        | 10391   |
| 9  | Child Development Disorders, Pervasive.mp. or Child Development Disorders, Pervasive/                                                                                                                                                                                                                    | 6532    |
| 10 | or/1-9                                                                                                                                                                                                                                                                                                   | 63595   |
| 11 | Diet, Gluten-Free/ or gluten*.mp. or Glutens/                                                                                                                                                                                                                                                            | 14243   |
| 12 | casein*.mp.                                                                                                                                                                                                                                                                                              | 34896   |
| 13 | Celiac Disease/ or Celiac Disease*.mp.                                                                                                                                                                                                                                                                   | 22734   |
| 14 | Caseins/ or Food Hypersensitivity/ or casein intolerance*.mp. or Milk Proteins/                                                                                                                                                                                                                          | 40759   |
| 15 | gluten intolerance*.mp.                                                                                                                                                                                                                                                                                  | 354     |
| 16 | casein-free*.mp.                                                                                                                                                                                                                                                                                         | 105     |
| 17 | casein intolerance*.mp.                                                                                                                                                                                                                                                                                  | 1       |
| 18 | Food Hypersensitivit*.mp.                                                                                                                                                                                                                                                                                | 15894   |

# The effect of a combined gluten- and casein-free diet on children and adolescents with autism spectrum disorders: A systematic review and meta-analysis

Amélie Keller, Marie Louise Rimestad, Jeanett Friis Rohde, Birgitte Holm Petersen, Christoffer Bruun Korfitsen, Simon Tarp, Marlene Briciet Lauritsen, Mina Nicole Händel

|    |                                                                                                                                                                                                                                                                                                                    |        |
|----|--------------------------------------------------------------------------------------------------------------------------------------------------------------------------------------------------------------------------------------------------------------------------------------------------------------------|--------|
| 19 | (diet* and elimination*).mp. [mp=title, abstract, original title, name of substance word, subject heading word, floating sub-heading word, keyword heading word, organism supplementary concept word, protocol supplementary concept word, rare disease supplementary concept word, unique identifier, synonyms]   | 6014   |
| 20 | elimination diet*.mp.                                                                                                                                                                                                                                                                                              | 1108   |
| 21 | (elimination* and casein*).mp. [mp=title, abstract, original title, name of substance word, subject heading word, floating sub-heading word, keyword heading word, organism supplementary concept word, protocol supplementary concept word, rare disease supplementary concept word, unique identifier, synonyms] | 211    |
| 22 | (elimination* and gluten*).mp. [mp=title, abstract, original title, name of substance word, subject heading word, floating sub-heading word, keyword heading word, organism supplementary concept word, protocol supplementary concept word, rare disease supplementary concept word, unique identifier, synonyms] | 204    |
| 23 | GI.mp. or Gastrointestinal Diseases/                                                                                                                                                                                                                                                                               | 79027  |
| 24 | gastrointestinal*.mp.                                                                                                                                                                                                                                                                                              | 361778 |
| 25 | 11 or 12 or 13 or 14 or 15 or 16 or 17 or 18 or 19 or 20 or 21 or 22 or 23 or 24                                                                                                                                                                                                                                   | 469898 |
| 26 | 10 and 25                                                                                                                                                                                                                                                                                                          | 1133   |
| 27 | limit 26 to (controlled clinical trial or randomized controlled trial)                                                                                                                                                                                                                                             | 36     |
| 28 | ((random* or cluster-random* or control?ed or crossover or cross-over or blind* or mask*) adj4 (trial*1 or study or studies or analy*)) or rct).ti,ab,kw,kf.                                                                                                                                                       | 675999 |
| 29 | (placebo* or single-blind* or double-blind* or triple-blind*).ti,ab.                                                                                                                                                                                                                                               | 276548 |
| 30 | ((single or double or triple) adj2 (blind* or mask*)).ti,ab.                                                                                                                                                                                                                                                       | 169913 |
| 31 | ((patient* or person* or participant* or population* or allocate* or assign*) adj3 (random* or blind* or mask*)).ti,ab,kw,kf.                                                                                                                                                                                      | 251574 |
| 32 | 28 or 29 or 30 or 31                                                                                                                                                                                                                                                                                               | 873153 |
| 33 | 26 and 32                                                                                                                                                                                                                                                                                                          | 103    |
| 34 | 27 or 33                                                                                                                                                                                                                                                                                                           | 109    |

# The effect of a combined gluten- and casein-free diet on children and adolescents with autism spectrum disorders: A systematic review and meta-analysis

Amélie Keller, Marie Louise Rimestad, Jeanett Friis Rohde, Birgitte Holm Petersen, Christoffer Bruun Korfitsen, Simon Tarp, Marlene Briciet Lauritsen, Mina Nicole Händel

|    |                              |    |
|----|------------------------------|----|
| 35 | limit 34 to yr="2016 - 2020" | 44 |
|----|------------------------------|----|

## Embase (270120)

Database(s): **Embase** 1996 to 2020 Week 04

Search Strategy:

| #  | Searches                                                                                                                                                                                                    | Results |
|----|-------------------------------------------------------------------------------------------------------------------------------------------------------------------------------------------------------------|---------|
| 1  | (autism* or ASD).mp. [mp=title, abstract, heading word, drug trade name, original title, device manufacturer, drug manufacturer, device trade name, keyword, floating subheading word, candidate term word] | 76615   |
| 2  | Autism Spectrum Disorder*.mp. or Autism Spectrum Disorder/                                                                                                                                                  | 51576   |
| 3  | Autism Disorder*.mp.                                                                                                                                                                                        | 189     |
| 4  | Autistic Disorder/ or Autistic Disorder*.mp.                                                                                                                                                                | 21123   |
| 5  | autistic*.mp.                                                                                                                                                                                               | 13934   |
| 6  | Asperger Syndrome/ or asperger*.mp.                                                                                                                                                                         | 5258    |
| 7  | asperger*.mp.                                                                                                                                                                                               | 5258    |
| 8  | Neurodevelopmental Disorders/ or neurodevelopmental disorder*.mp.                                                                                                                                           | 143116  |
| 9  | Child Development Disorders, Pervasive.mp. or Child Development Disorders, Pervasive/                                                                                                                       | 19000   |
| 10 | or/1-9                                                                                                                                                                                                      | 213283  |
| 11 | Diet, Gluten-Free/ or gluten*.mp. or Glutens/                                                                                                                                                               | 17164   |
| 12 | casein*.mp.                                                                                                                                                                                                 | 26618   |
| 13 | Celiac Disease/ or Celiac Disease*.mp.                                                                                                                                                                      | 26301   |
| 14 | Caseins/ or Food Hypersensitivity/ or casein intolerance*.mp. or Milk Proteins/                                                                                                                             | 23737   |
| 15 | gluten intolerance*.mp.                                                                                                                                                                                     | 400     |
| 16 | casein-free*.mp.                                                                                                                                                                                            | 149     |
| 17 | casein intolerance*.mp.                                                                                                                                                                                     | 3       |

# The effect of a combined gluten- and casein-free diet on children and adolescents with autism spectrum disorders: A systematic review and meta-analysis

Amélie Keller, Marie Louise Rimestad, Jeanett Friis Rohde, Birgitte Holm Petersen, Christoffer Bruun Korfitsen, Simon Tarp, Marlene Briciet Lauritsen, Mina Nicole Händel

|    |                                                                                                                                                                                                                       |         |
|----|-----------------------------------------------------------------------------------------------------------------------------------------------------------------------------------------------------------------------|---------|
| 18 | Food Hypersensitivit*.mp.                                                                                                                                                                                             | 1455    |
| 19 | (diet* and elimination*).mp. [mp=title, abstract, heading word, drug trade name, original title, device manufacturer, drug manufacturer, device trade name, keyword, floating subheading word, candidate term word]   | 7947    |
| 20 | elimination diet*.mp.                                                                                                                                                                                                 | 1971    |
| 21 | (elimination* and casein*).mp. [mp=title, abstract, heading word, drug trade name, original title, device manufacturer, drug manufacturer, device trade name, keyword, floating subheading word, candidate term word] | 263     |
| 22 | (elimination* and gluten*).mp. [mp=title, abstract, heading word, drug trade name, original title, device manufacturer, drug manufacturer, device trade name, keyword, floating subheading word, candidate term word] | 314     |
| 23 | GI.mp. or Gastrointestinal Diseases/                                                                                                                                                                                  | 77373   |
| 24 | gastrointestinal*.mp.                                                                                                                                                                                                 | 465118  |
| 25 | 11 or 12 or 13 or 14 or 15 or 16 or 17 or 18 or 19 or 20 or 21 or 22 or 23 or 24                                                                                                                                      | 566078  |
| 26 | 10 and 25                                                                                                                                                                                                             | 6352    |
| 27 | limit 26 to (controlled clinical trial or randomized controlled trial)                                                                                                                                                | 678     |
| 28 | ((random* or cluster-random* or control?ed or crossover or cross-over or blind* or mask*) adj4 (trial*1 or study or studies or analy*)) or rct).ti,ab,kw.                                                             | 849033  |
| 29 | (placebo* or single-blind* or double-blind* or triple-blind*).ti,ab.                                                                                                                                                  | 319592  |
| 30 | ((single or double or triple) adj2 (blind* or mask*)).ti,ab.                                                                                                                                                          | 185601  |
| 31 | ((patient* or person* or participant* or population* or allocate* or assign*) adj3 (random* or blind* or mask*)).ti,ab,kw.                                                                                            | 317765  |
| 32 | 28 or 29 or 30 or 31                                                                                                                                                                                                  | 1076453 |
| 33 | 26 and 32                                                                                                                                                                                                             | 966     |
| 34 | 27 or 33                                                                                                                                                                                                              | 1125    |
| 35 | limit 34 to yr="2016 - 2020"                                                                                                                                                                                          | 241     |

# The effect of a combined gluten- and casein-free diet on children and adolescents with autism spectrum disorders: A systematic review and meta-analysis

Amélie Keller, Marie Louise Rimestad, Jeanett Friis Rohde, Birgitte Holm Petersen, Christoffer Bruun Korfitsen, Simon Tarp, Marlene Briciet Lauritsen, Mina Nicole Händel

|    |                                                                                               |     |
|----|-----------------------------------------------------------------------------------------------|-----|
| 36 | limit 26 to ((randomized controlled trial or controlled clinical trial) and yr="2016 - 2020") | 137 |
| 37 | 35 or 36                                                                                      | 241 |

## Cinahl (270120)

| #   | Query                                                                                                                                          | Results |
|-----|------------------------------------------------------------------------------------------------------------------------------------------------|---------|
| S20 | S13 AND S18<br>Limiters - Published Date: 20160101-20191231                                                                                    | 39      |
| S19 | S13 AND S18                                                                                                                                    | 87      |
| S18 | S14 OR S15 OR S16 OR S17                                                                                                                       | 473,650 |
| S17 | PT Randomized Controlled Trial                                                                                                                 | 86,203  |
| S16 | ((patient* or person* or participant* or population* or allocate* or assign*) N3 (random* or blind* or mask*))                                 | 305,012 |
| S15 | (placebo* or single-blind* or double-blind* or triple-blind* or ((single or double or triple) N1 (blind* or mask*))                            | 99,667  |
| S14 | ((((random* or cluster-random* or control#ed or crossover or cross-over or blind* or mask*) N3 (trial* or study or studies or analy*)) or rct) | 449,145 |
| S13 | S11 AND S12                                                                                                                                    | 723     |
| S12 | S3 OR S4 OR S5 OR S6 OR S7 OR S8 OR S9 OR S10                                                                                                  | 228,081 |
| S11 | S1 OR S2                                                                                                                                       | 28,233  |
| S10 | elimination diet*                                                                                                                              | 239     |
| S9  | gluten* and elimination*                                                                                                                       | 56      |
| S8  | casein* and elimination*                                                                                                                       | 19      |
| S7  | diet* and elimination*                                                                                                                         | 772     |
| S6  | (MH "Food Hypersensitivity+") OR "food hypersensitivit**"                                                                                      | 5,664   |
| S5  | (MH "Diet+") OR (MH "Diet, Gluten-Free") OR "diet**"                                                                                           | 220,902 |
| S4  | (MH "Caseins") OR "casein**"                                                                                                                   | 1,390   |
| S3  | (MH "Gluten") OR (MH "Diet, Gluten-Free") OR (MH "Celiac Disease+") OR "gluten**"                                                              | 6,243   |
| S2  | (MH "Autistic Disorder") OR (MH "Asperger Syndrome") OR "autism"                                                                               | 26,670  |
| S1  | autism* or ASD                                                                                                                                 | 24,852  |

The effect of a combined gluten- and casein-free diet on children and adolescents with autism spectrum disorders: A systematic review and meta-analysis

Amélie Keller, Marie Louise Rimestad, Jeanett Friis Rohde, Birgitte Holm Petersen, Christoffer Bruun Korfisen, Simon Tarp, Marlene Briciet Lauritsen, Mina Nicole Händel

## Assessment of the methodological quality of the included systematic reviews (AMSTAR).

The different domains are presented in the top row. The individual studies are shown in the left column

| Citation          | List relevant outcomes | Was meta-analysis performed for the relevant outcomes? | 1. Was an 'a priori' design provided? | 2. Was there duplicate study selection and data extraction? | 3. Was a comprehensive literature search performed? | 4. Was the status of publication (i.e. grey literature) used as an inclusion criterion? | 5. Was a list of studies (included and excluded) provided? | 6. Were the characteristics of the included studies provided? | 7. Was the scientific quality of the included studies assessed and documented? | 8. Was the scientific quality of the included studies used appropriately in the synthesis? | 9. Were the methods used to combine the findings of studies appropriate? | 10. Was the likelihood of publication bias assessed? | 11. Was the conflict of interest included? |
|-------------------|------------------------|--------------------------------------------------------|---------------------------------------|-------------------------------------------------------------|-----------------------------------------------------|-----------------------------------------------------------------------------------------|------------------------------------------------------------|---------------------------------------------------------------|--------------------------------------------------------------------------------|--------------------------------------------------------------------------------------------|--------------------------------------------------------------------------|------------------------------------------------------|--------------------------------------------|
| Piwowarczyk, 2018 | NA                     | NA                                                     | No                                    | Yes                                                         | Yes                                                 | No                                                                                      | Yes                                                        | Yes                                                           | Yes                                                                            | No                                                                                         | NA                                                                       | No                                                   | Yes                                        |
| Elder 2008        | NA                     | NA                                                     | No                                    | Yes                                                         | Yes                                                 | No                                                                                      | Yes                                                        | Yes                                                           | No                                                                             | Yes                                                                                        | NA                                                                       | No                                                   | No                                         |
| Brondino 2015     | NA                     | NA                                                     | No                                    | No                                                          | Yes                                                 | Can't answer                                                                            | No                                                         | Yes                                                           | Can't answer                                                                   | Yes                                                                                        | NA                                                                       | No                                                   | No                                         |

## The effect of a combined gluten- and casein-free diet on children and adolescents with autism spectrum disorders: A systematic review and meta-analysis

Amélie Keller, Marie Louise Rimestad, Jeanett Friis Rohde, Birgitte Holm Petersen, Christoffer Bruun Korfitsen, Simon Tarp, Marlene Briciet Lauritsen, Mina Nicole Händel

### Characteristics of excluded studies

| Study reference                                                                                                                                                                                                                                                                                                                                                                                                                                                                                                                                             | Reasons for exclusion     |
|-------------------------------------------------------------------------------------------------------------------------------------------------------------------------------------------------------------------------------------------------------------------------------------------------------------------------------------------------------------------------------------------------------------------------------------------------------------------------------------------------------------------------------------------------------------|---------------------------|
| <p>Adams, James B.; Audhya, Tapan; Geis, Elizabeth; Gehn, Eva; Fimbres, Valeria; Pollard, Elena L.; Mitchell, Jessica; Ingram, Julie; Hellmers, Robert; Laake, Dana; Matthews, Julie S.; Li, Kefeng; Naviaux, Jane C.; Naviaux, Robert K.; Adams, Rebecca L.; Coleman, Devon M.; Quig, David W.. Comprehensive Nutritional and Dietary Intervention for Autism Spectrum Disorder-A Randomized, Controlled 12-Month Trial. <i>Nutrients</i> 2018;10(3). [DOI: <a href="https://dx.doi.org/10.3390/nu10030369">https://dx.doi.org/10.3390/nu10030369</a>]</p> | <p>Wrong intervention</p> |
| <p>Ghalichi, Faezeh; Ghaemmaghami, Jamal; Malek, Ayyoub; Ostadrahimi, Alireza. Effect of gluten free diet on gastrointestinal and behavioral indices for children with autism spectrum disorders: a randomized clinical trial. <i>World journal of pediatrics : WJP</i> 2016;12(4):436-442. [DOI: ]</p>                                                                                                                                                                                                                                                     | <p>Wrong intervention</p> |
| <p>Hyman, S. L.; Stewart, P. A.; Foley, J.; Cain, U.; Peck, R.; Morris, D. D.; Wang, H.; Smith, T.. The Gluten-Free/Casein-Free Diet: A Double-Blind Challenge Trial in Children with Autism. <i>Journal of Autism and Developmental Disorders</i> 2016;46(1):205-220. [DOI: 10.1007/s10803-015-2564-9 [doi]]</p>                                                                                                                                                                                                                                           | <p>Wrong intervention</p> |
| <p>Hyman, Susan L.; Stewart, Patricia A.; Foley, Jennifer; Cain, Usa; Peck, Robin; Morris, Danielle D.; Wang, Hongyue; Smith, Tristram. The Gluten-Free/Casein-Free Diet: A Double-Blind Challenge Trial in Children with Autism. <i>Journal of Autism and Developmental Disorders</i> 2016;46(1):205-220. [DOI: <a href="https://dx.doi.org/10.1007/s10803-015-2564-9">https://dx.doi.org/10.1007/s10803-015-2564-9</a>]</p>                                                                                                                               | <p>Wrong intervention</p> |
| <p>Mari-Bauset, Salvador; Llopis-Gonzalez, Agustin; Zazpe, Itziar; Mari-Sanchis, Amelia; Suarez-Varela, Maria. Nutritional Impact of a Gluten-Free Casein-Free Diet in Children with Autism Spectrum Disorder. <i>Journal of Autism and Developmental Disorders</i> 2016;46(2):673-84. [DOI: <a href="https://dx.doi.org/10.1007/s10803-015-2582-7">https://dx.doi.org/10.1007/s10803-015-2582-7</a>]</p>                                                                                                                                                   | <p>Wrong intervention</p> |



## The effect of a combined gluten- and casein-free diet on children and adolescents with autism spectrum disorders: A systematic review and meta-analysis

Amélie Keller, Marie Louise Rimestad, Jeanett Friis Rohde, Birgitte Holm Petersen, Christoffer Bruun Korfitsen, Simon Tarp, Marlene Briciet Lauritsen, Mina Nicole Händel

|                                                                                                                                                                                                                                                                                                   |                           |
|---------------------------------------------------------------------------------------------------------------------------------------------------------------------------------------------------------------------------------------------------------------------------------------------------|---------------------------|
| <p>Puspongoro, H. D.; Ismael, S.; Firmansyah, A.; Sastroasmoro, S.; Vandenplas, Y.. Gluten and casein supplementation does not increase symptoms in children with autism spectrum disorder. <i>Acta Paediatrica</i> (Oslo, Norway : 1992) 2015;104(11):e500-5. [DOI: 10.1111/apa.13108 [doi]]</p> | <p>Wrong intervention</p> |
| <p>Seung, H.; Rogalski, Y.; Shankar, M.; Elder, J.. Seung H, Rogalski Y, Shankar M, Elder J. The gluten- and casein-free diet and autism: communication outcomes from a preliminary double-blind clinical trial.. 2007;15(4):337-345. [DOI: ]</p>                                                 | <p>Wrong intervention</p> |

# The effect of a combined gluten- and casein-free diet on children and adolescents with autism spectrum disorders: A systematic review and meta-analysis

Amélie Keller, Marie Louise Rimestad, Jeanett Friis Rohde, Birgitte Holm Petersen, Christoffer Bruun Korfitsen, Simon Tarp, Marlene Briciet Lauritsen, Mina Nicole Händel

---
